# Supplementary material for: Tetradecanuclearity in 3d–4f chemistry: relaxation and magnetocaloric effects in [NiII6LnIII8] species
Source: Royal Society of Chemistry journal article supplement (doi:10.1039/c7dt00102a), 2017-01-01
Supplement: c7dt00102a1.pdf [file c7dt00102a1.pdf]

## ELECTRONIC SUPPLEMENTARY INFORMATION

to

### **Tetradecanuclearity in 3*d*-4*f* chemistry: relaxation and magnetocaloric effects in [Ni<sup>II</sup><sub>6</sub>Ln<sup>III</sup><sub>8</sub>] species †**

Angelos B. Canaj,<sup>a</sup> Dimitris A. Kalofolias,<sup>a</sup> Milosz Siczek,<sup>b</sup> Tadeusz Lis,<sup>b</sup> Robbie McNab,<sup>c</sup> Giulia Lorusso,<sup>d</sup> Ross Inglis,<sup>c,\*</sup> Marco Evangelisti<sup>d,\*</sup> and Constantinos J. Milios<sup>a,\*</sup>

<sup>a</sup> Department Of Chemistry, University of Crete, Voutes 71003, Herakleion, Greece. Fax: +30-2810-545001; Tel: +30-2810-545099; E-mail: [komil@uoc.gr](mailto:komil@uoc.gr)

<sup>b</sup> Faculty of Chemistry, University of Wrocław, Joliot-Curie 14, Wrocław 50-383, Poland.

<sup>c</sup> EaStCHEM School of Chemistry, The University of Edinburgh, David Brewster Road, EH9 3FJ, Edinburgh, UK.

<sup>d</sup> Instituto de Ciencia de Materiales de Aragón(ICMA), CSIC – Universidad de Zaragoza, 50009 Zaragoza, Spain.

## Materials and physical measurements

All manipulations were performed under aerobic conditions, using materials as received. Elemental analyses (C, H, N) were performed by the University of Ioannina microanalysis service. Variable-temperature, solid-state direct current (dc) magnetic susceptibility data down to 2.0 K were collected on a Quantum Design MPMS-XL SQUID magnetometer equipped with a 7 T DC magnet at the University of Edinburgh, and on a Quantum Design MPMS-XL SQUID magnetometer equipped with a 5 T DC magnet at the University of Zaragoza. Diamagnetic corrections were applied to the observed paramagnetic susceptibilities using Pascal's constants. The heat capacity measurements were carried out for temperatures down to 0.3 K by using a Quantum Design 9T-PPMS, equipped with a  $^3\text{He}$  cryostat. The experiment was performed on a thin pressed pellet (*ca.* 1 mg) of a polycrystalline sample of **1**, thermalized by about 0.2 mg of Apiezon N grease, whose contribution was subtracted by using a phenomenological expression. Powder XRD measurements were collected on freshly prepared samples **1** and **2** on a PANalytical X'Pert Pro MPD diffractometer at the University of Crete.

## Synthesis

*General synthetic strategy applicable to 1 and 2:*

$\text{Ni}(\text{ClO}_4)_2 \cdot 6\text{H}_2\text{O}$  (110 mg, 0.3 mmol),  $\text{Gd}(\text{NO}_3)_3 \cdot 6\text{H}_2\text{O}$  (135 mg, 0.3 mmol), 2-hydroxy-1-naphthaldehyde (52mg, 0.3 mmol), 2-aminoisobutyric acid (31 mg, 0.3 mmol) and  $\text{NEt}_3$  were dissolved in a mixture of solvents MeOH/MeCN (10 ml, 1:1) yielding in a green solution. The solution was then transferred into a 25 ml Teflon-lined stainless-steel autoclave and heated at 120 °C for 12 hours. After slow cooling to room temperature, light green crystals of the general formulae  $[\text{Ni}^{\text{II}}_6\text{Gd}^{\text{III}}_8(\text{OH})_{10}(\text{L})_6(\text{aib})_4(\text{naphth})_4(\text{NO}_3)_4(\text{MeO})_2] \cdot \text{MeCN} \cdot \text{H}_2\text{O}$  were isolated in ~ 25-30 % yield. For **2**,  $[\text{Ni}^{\text{II}}_6\text{Dy}^{\text{III}}_8(\text{OH})_{10}(\text{L})_6(\text{aib})_4(\text{naphth})_4(\text{NO}_3)_4(\text{MeO})_2] \cdot \text{MeCN} \cdot 0.5\text{H}_2\text{O}$  the same exactly procedure was followed as in the case of **1**, with the use of  $\text{Dy}(\text{NO}_3)_3 \cdot 6\text{H}_2\text{O}$  (135 mg, 0.3 mmol) instead of  $\text{Gd}(\text{NO}_3)_3 \cdot 6\text{H}_2\text{O}$ .

Elemental Anal. calcd (found) for **1**·MeCN·H<sub>2</sub>O: C 38.74 (38.59), H 3.36 (3.59), N 4.4 (4.53) %.  
**2**·MeCN: C 38.81 (38.89), H 3.32 (3.91), N 4.41 (4.33) %.

**Table S1.** Crystallographic data for complexes **1** and **2**.

|                                                | <b>1</b> ·MeCN·H <sub>2</sub> O                                                                   | <b>2</b> ·MeCN·0.5H <sub>2</sub> O                                                                |
|------------------------------------------------|---------------------------------------------------------------------------------------------------|---------------------------------------------------------------------------------------------------|
| Formula <sup>a</sup>                           | C <sub>152</sub> H <sub>154</sub> Gd <sub>8</sub> Ni <sub>6</sub> O <sub>58</sub> N <sub>14</sub> | C <sub>152</sub> H <sub>154</sub> Dy <sub>8</sub> Ni <sub>6</sub> O <sub>58</sub> N <sub>14</sub> |
| <i>M<sub>w</sub></i>                           | 4773.20                                                                                           | 4807.20                                                                                           |
| Crystal System                                 | Triclinic                                                                                         | Triclinic                                                                                         |
| Space group                                    | P-1                                                                                               | P-1                                                                                               |
| <i>a</i> /Å                                    | 14.238 (5)                                                                                        | 14.200 (5)                                                                                        |
| <i>b</i> /Å                                    | 18.199 (7)                                                                                        | 18.006 (7)                                                                                        |
| <i>c</i> /Å                                    | 18.053 (7)                                                                                        | 18.029 (7)                                                                                        |
| <i>α</i> /°                                    | 69.20 (4)                                                                                         | 69.78 (4)                                                                                         |
| <i>β</i> /°                                    | 83.19 (3)                                                                                         | 83.79 (3)                                                                                         |
| <i>γ</i> /°                                    | 83.63 (3)                                                                                         | 84.34 (3)                                                                                         |
| <i>V</i> /Å <sup>3</sup>                       | 4330 (3)                                                                                          | 4291 (3)                                                                                          |
| <i>Z</i>                                       | 1                                                                                                 | 1                                                                                                 |
| <i>T</i> /K                                    | 100                                                                                               | 90                                                                                                |
| <i>λ</i> <sup>b</sup> /Å                       | 0.71073                                                                                           | 0.71073                                                                                           |
| <i>D<sub>c</sub></i> /g cm <sup>-3</sup>       | 1.830                                                                                             | 1.860                                                                                             |
| <i>μ</i> (Mo-K <sub>α</sub> )/mm <sup>-1</sup> | 3.74                                                                                              | 4.16                                                                                              |
| Meas./indep.( <i>R</i> <sub>int</sub> ) refl.  | 44318 /160993 (0.096)                                                                             | 31346/16022 (0.053)                                                                               |
| Obs. refl. [ <i>I</i> >2σ( <i>I</i> )]         | 9924                                                                                              | 10025                                                                                             |
| <i>wR</i> <sup>2c,d</sup>                      | 0.208                                                                                             | 0.190                                                                                             |
| <i>R</i> <sup>1d,e</sup>                       | 0.070                                                                                             | 0.061                                                                                             |
| Goodness of fit on <i>F</i> <sup>2</sup>       | 1.04                                                                                              | 1.03                                                                                              |
| Δρ <sub>max,min</sub> /eÅ <sup>-3</sup>        | 3.56, -1.37                                                                                       | 1.96, -1.06                                                                                       |

<sup>a</sup>Including solvate molecules, <sup>b</sup>Mo-K<sub>α</sub> radiation(graphite monochromator), <sup>c</sup>*wR*<sup>2</sup>= [Σ*w*(*F<sub>o</sub>*<sup>2</sup>- *F<sub>c</sub>*<sup>2</sup>)<sup>2</sup>/ Σ*wF<sub>o</sub>*<sup>2</sup>]<sup>1/2</sup>, <sup>d</sup>For observed data, <sup>e</sup>*R*<sup>1</sup>= Σ||*F<sub>o</sub>*|- |*F<sub>c</sub>*||/ Σ|*F<sub>o</sub>*|.

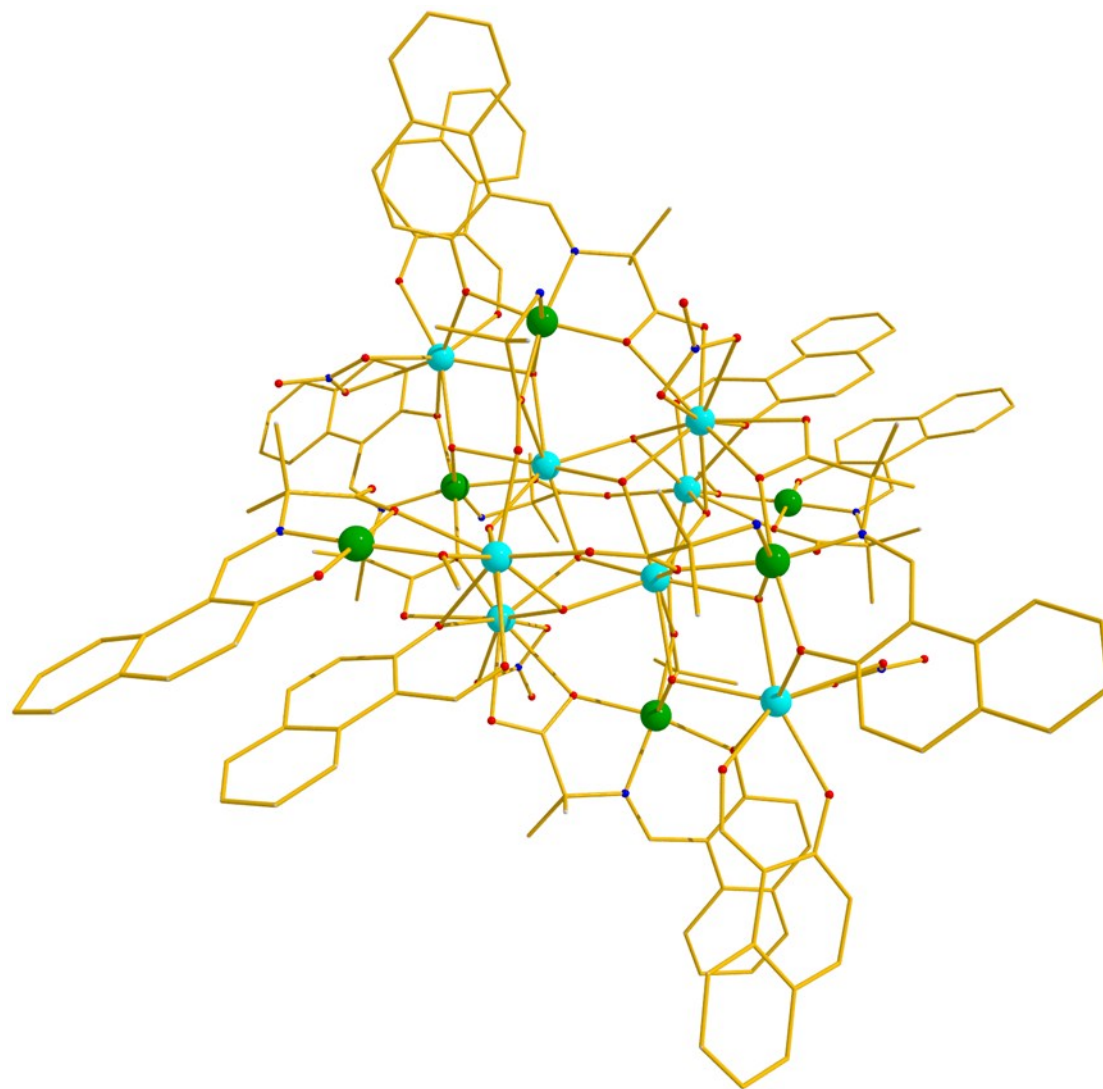

**Figure S1.** A “clear” view of complex **1**. Solvent molecules and H-atoms are omitted for clarity.  
Colour code: Ni<sup>II</sup> = green, Gd<sup>III</sup> = turquoise, O = red, N = blue, C = grey.

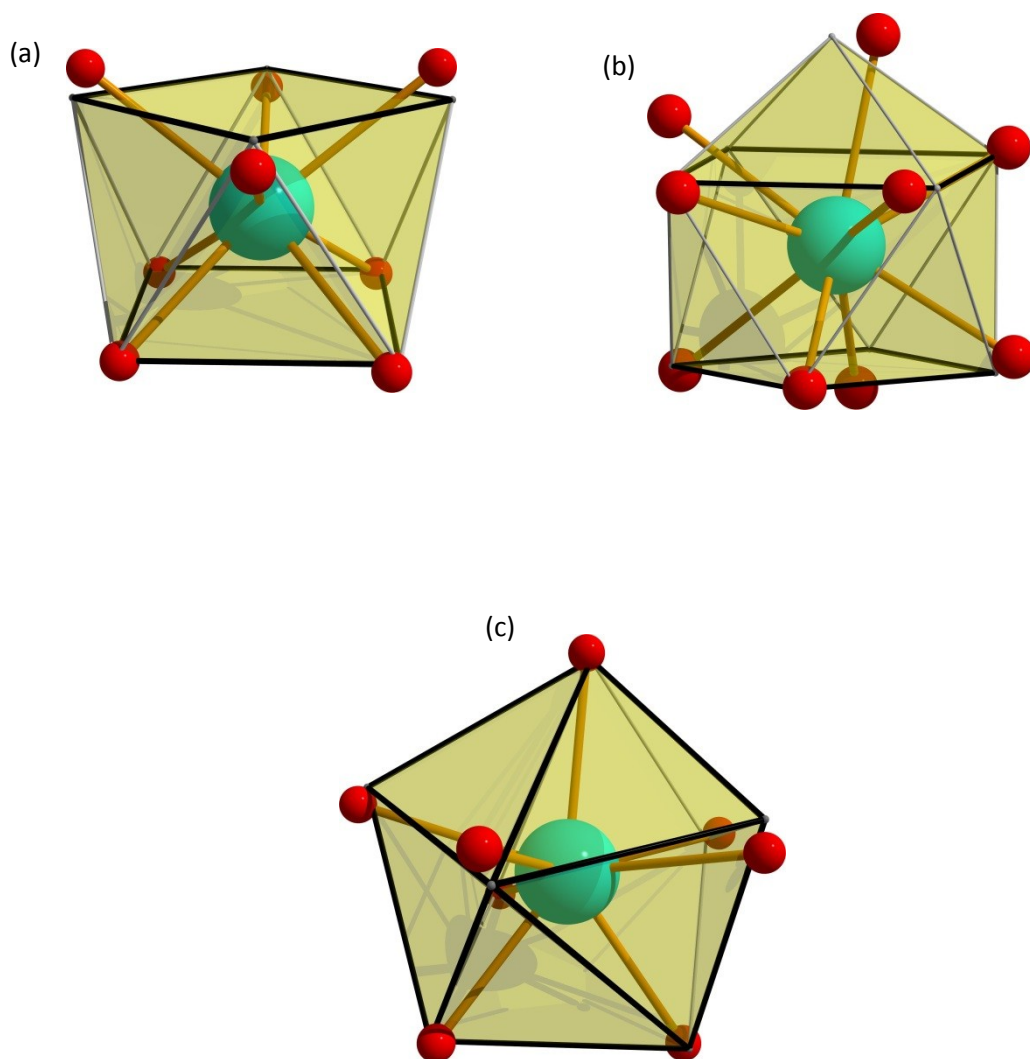

**Figure S2.** a) Square antiprismatic coordination sphere for both Gd1 and Gd2, (b) spherical capped square antiprismatic geometry for Gd3 and c) triangular dodecahedron geometry for Gd4, as calculated with the program SHAPE.

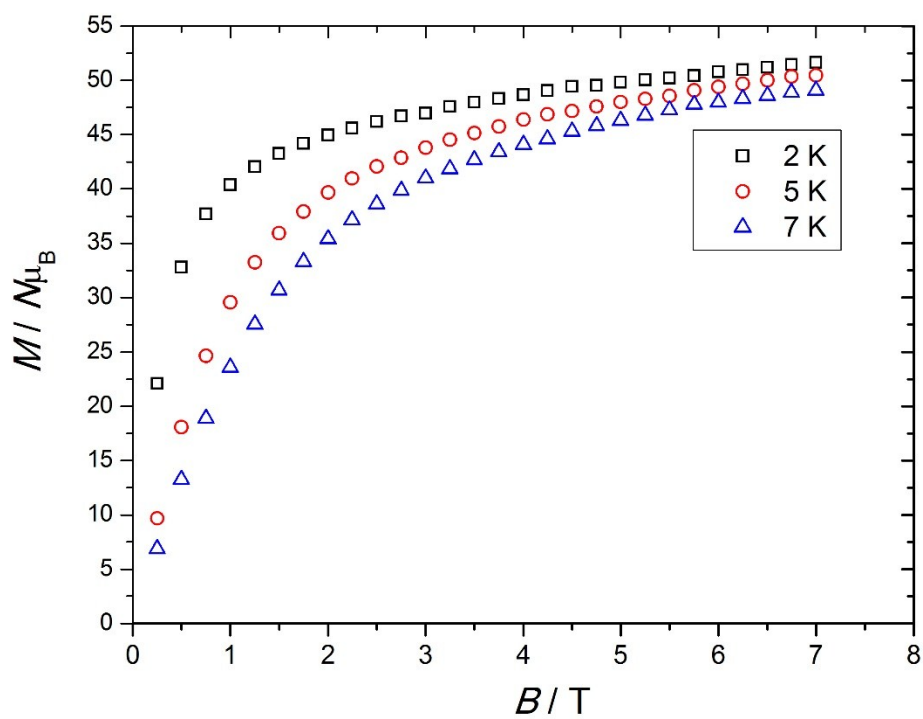

**Figure S3.**  $M$  vs.  $H$  plot for complex 1 in the 1 – 7 T and 2.0 – 7.0 K field and temperature range.

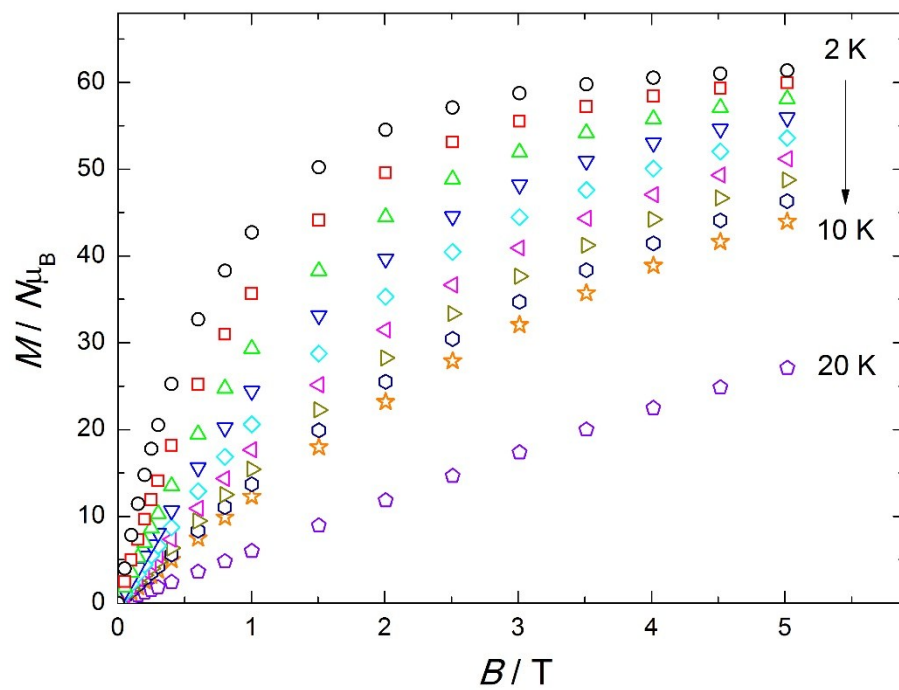

**Figure S4.**  $M$  vs.  $H$  plot for complex 2 in the 1 – 5 T and 2.0 – 20.0 K field and temperature range.

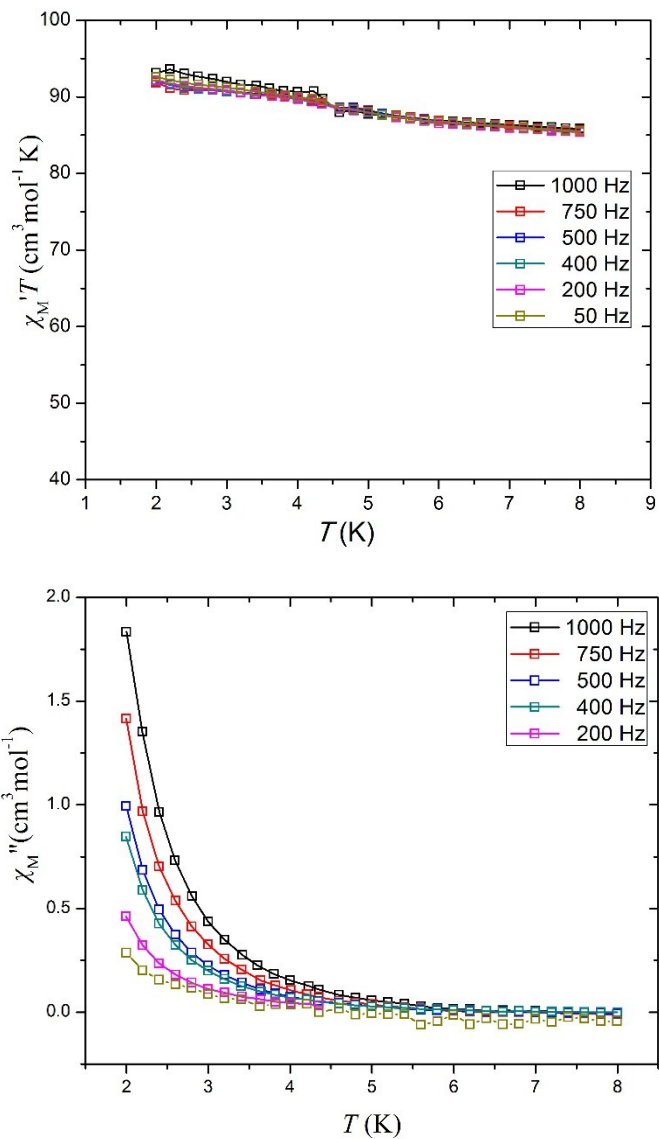

**Figure S5.** Plot of the in-phase  $\chi_M' T$  (top) and out-of-phase  $\chi_M''$  signals (bottom) for **2** in ac susceptibility studies vs.  $T$  in a 3.5 G oscillating field at the indicated frequencies.
